# Supplementary material for: Dichlorine–pyridine N-oxide halogen-bonded complexes
Source: Royal Society of Chemistry journal article supplement (doi:10.1039/d4sc06270a), 2024-01-01
Supplement: d4sc06270a1.pdf [file d4sc06270a1.pdf]

## Supporting Information

Niklas Limberg,<sup>[a]</sup> J. Mikko Rautiainen,<sup>[b]</sup> Jan Lundell,<sup>[b]</sup> Sebastian Riedel,<sup>[a]</sup> Kari Rissanen,<sup>[b]</sup>  
Rakesh Puttreddy<sup>[b]</sup>

<sup>a</sup>*Department of Chemistry and Biochemistry, Freie Universität Berlin, Fabeckstr. 34/36, 14195  
Berlin, Germany.*

<sup>b</sup>*University of Jyväskylä, Department of Chemistry, P.O. Box. 35, FI-40014 University of Jyväskylä,  
Finland*

### Table of Contents

|                                                   |                       |
|---------------------------------------------------|-----------------------|
| <b>1. X-ray Crystallography</b>                   | <b><i>Page S2</i></b> |
| <b>2. Density Functional Theory Studies (DFT)</b> | <b><i>Page S7</i></b> |

## 1. X-ray Crystallographic Studies

### 1.1 General information

The X-ray crystal structure data for **H[246TriMePyNO]<sub>2</sub>[Cl<sub>3</sub>] - Cl<sub>2</sub>-26DiMePyNO** were collected at 100 K, using a Bruker D8 Venture diffractometer equipped with a CMOS area detector and Mo-K $\alpha$  ( $\lambda = 0.71073 \text{ \AA}$ ) radiation. APEX5 (version v2023.9-2) was used for the data collection and reduction, and the intensities were absorption corrected using a multi-scan absorption correction method. All structures were solved by intrinsic phasing (SHELXT)<sup>[2]</sup> and refined by full-matrix least squares on  $F^2$  using the OLEX2<sup>[3]</sup>, utilizing the SHELXL-2015 module.<sup>[4,5]</sup> Anisotropic displacement parameters were assigned to non-H atoms and isotropic displacement parameters for all H atoms were constrained to multiples of the equivalent displacement parameters of their parent atoms with  $U_{\text{iso}}(\text{H}) = 1.2 U_{\text{eq}}(\text{parent atom})$ . The X-ray single crystal data and CCDC numbers of all new structures are included below. CCDC 2383798-2383807 contains the supplementary crystallographic data for this paper. These data can be obtained free of charge via <http://www.ccdc.cam.ac.uk/conts/retrieving.html> (or from the CCDC, 12 Union Road, Cambridge CB2 1EZ, UK; Fax: +44 1223 336033; E-mail: [deposit@ccdc.cam.ac.uk](mailto:deposit@ccdc.cam.ac.uk)).

### 1.2 Hydrogen-bonded complexes

#### 1.2.1 Complex H[246TriMePyNO]<sub>2</sub>[Cl<sub>3</sub>]

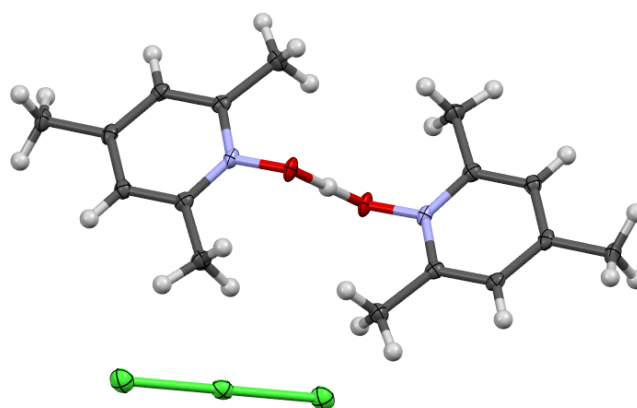

**Figure S1.** The X-ray crystal structure of **H[246TriMePyNO]<sub>2</sub>[Cl<sub>3</sub>]** with the thermal displacement parameter at 50% probability level. Colour Key: green = chlorine, blue = nitrogen, dark grey = carbon, white = hydrogen.

Crystal data for **H[246TriMePyNO]<sub>2</sub>[Cl<sub>3</sub>]**: CCDC-2383804. C<sub>16</sub>H<sub>23</sub>Cl<sub>3</sub>N<sub>2</sub>O<sub>2</sub>, M = 381.71 g/mol, clear yellow block, 0.235 × 0.199 × 0.177 mm<sup>3</sup>, triclinic, space group  $P\bar{1}$ , a = 7.2228(13) Å, b = 8.5908(16) Å, c = 8.6321(17) Å,  $\alpha = 68.449(6)^\circ$ ,  $\beta = 65.454(6)^\circ$ ,  $\gamma = 78.430(7)^\circ$ , V = 452.42(15) Å<sup>3</sup>, Z = 1, D<sub>calc</sub> = 1.401 gcm<sup>-3</sup>, F<sub>000</sub> = 200,  $\mu = 0.516 \text{ mm}^{-1}$ , T = 100 K,  $\theta_{\text{max}} = 52.746^\circ$ , 14067 total reflections, 1497 with  $I_o > 2\sigma(I_o)$ , R<sub>int</sub> = 0.0761, 1840 data, 110 parameters, 0 restraints, GooF = 1.048, R<sub>1</sub> = 0.0339 and wR<sub>2</sub> = 0.0848 [ $I_o > 2\sigma(I_o)$ ], R<sub>1</sub> = 0.0479 and wR<sub>2</sub> = 0.0954 (all reflections), 0.31 < dΔρ < -0.35 eÅ<sup>-3</sup>.

### 1.2.2 Complex $\text{H}[24\text{DiMePyNO}]_2[\text{Cl}_3] \cdot 2[24\text{DiMePyNO}]$

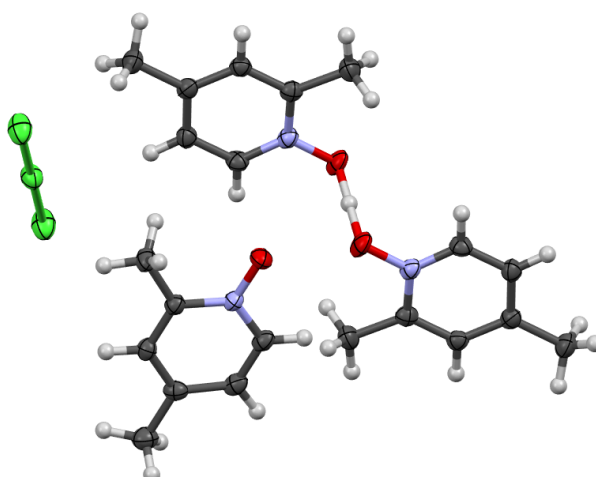

**Figure S2.** The X-ray crystal structure of  $\text{H}[24\text{DiMePyNO}]_2[\text{Cl}_3] \cdot 2[24\text{DiMePyNO}]$  with the thermal displacement parameter at 50% probability level. Colour Key: green = chlorine, blue = nitrogen, dark grey = carbon, white = hydrogen.

Crystal data for  $\text{H}[24\text{DiMePyNO}]_2[\text{Cl}_3] \cdot 2[24\text{DiMePyNO}]$ : CCDC-2383802.  $\text{C}_{28}\text{H}_{37}\text{Cl}_3\text{N}_4\text{O}_4$ ,  $M = 599.96$  g/mol, colorless plate,  $0.261 \times 0.093 \times 0.053$  mm<sup>3</sup>, triclinic, space group  $P\bar{1}$ ,  $a = 7.3618(17)$  Å,  $b = 8.291(2)$  Å,  $c = 13.265(3)$  Å,  $\alpha = 85.903(9)^\circ$ ,  $\beta = 88.725(7)^\circ$ ,  $\gamma = 66.463(8)^\circ$ ,  $V = 740.4(3)$  Å<sup>3</sup>,  $Z = 1$ ,  $D_{\text{calc}} = 1.346$  gcm<sup>-3</sup>,  $F(000) = 316$ ,  $\mu = 0.349$  mm<sup>-1</sup>,  $T = 100$  K,  $\theta_{\text{max}} = 52.914^\circ$ , 3039 total reflections, 1972 with  $I_o > 2\sigma(I_o)$ ,  $R_{\text{int}} = 0.1199$ , 3039 data, 183 parameters, 0 restraints,  $\text{Goof} = 1.049$ ,  $R_1 = 0.0607$  and  $wR_2 = 0.1420$  [ $I_o > 2\sigma(I_o)$ ],  $R_1 = 0.1003$  and  $wR_2 = 0.1622$  (all reflections),  $0.38 < \Delta\rho < -0.46$  eÅ<sup>-3</sup>, non-merohedric twin.

### 1.2.3. Complex $\text{H}[2\text{Me4OMePyNO}]_2[\text{Cl}_3]$

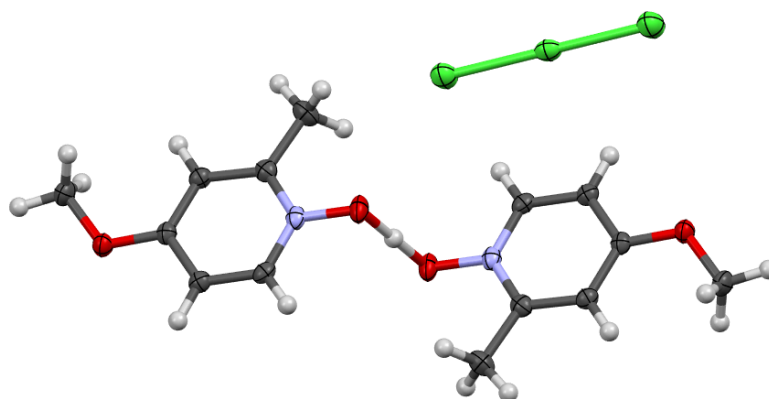

**Figure S3.** The X-ray crystal structure of  $\text{H}[2\text{Me4OMePyNO}]_2[\text{Cl}_3]$  with the thermal displacement parameter at 50% probability level. Colour Key: green = chlorine, blue = nitrogen, dark grey = carbon, white = hydrogen.

Crystal data for **H[2Me4OMePyNO]<sub>2</sub>[Cl<sub>3</sub>]**: CCDC-2383801. C<sub>14</sub>H<sub>19</sub>Cl<sub>3</sub>N<sub>2</sub>O<sub>4</sub>, M = 385.66 g/mol, colorless block, 0.677 × 0.279 × 0.182 mm<sup>3</sup>, monoclinic, space group C2/c, a = 11.8112(5) Å, b = 8.9258(3) Å, c = 17.6828(8) Å, α = 90°, β = 108.1780(10)°, γ = 90°, V = 1771.16(13) Å<sup>3</sup>, Z = 4, D<sub>calc</sub> = 1.446 gcm<sup>-3</sup>, F000 = 800, μ = 0.537 mm<sup>-1</sup>, T = 100 K, θ<sub>max</sub> = 56.644°, 2205 total reflections, 1955 with I<sub>o</sub> > 2σ(I<sub>o</sub>), R<sub>int</sub> = 0.0904, 2205 data, 109 parameters, 0 restraints, GooF = 1.119, R<sub>1</sub> = 0.0363 and wR<sub>2</sub> = 0.0909 [I<sub>o</sub> > 2σ(I<sub>o</sub>)], R<sub>1</sub> = 0.0414 and wR<sub>2</sub> = 0.0950 (all reflections), 0.60 < dΔρ < -0.36 eÅ<sup>-3</sup>, non-merohedric twin.

#### 1.2.4. Complex H[2PhPyNO]<sub>2</sub>[Cl<sub>3</sub>]

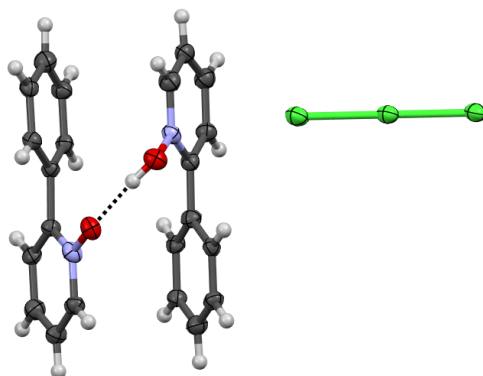

**Figure S4.** The X-ray crystal structure of **H[2PhPyNO][Cl<sub>3</sub>]** with the thermal displacement parameter at 50% probability level. Colour Key: green = chlorine, blue = nitrogen, dark grey = carbon, white = hydrogen. The black broken line represents the hydrogen bond.

Crystal data for **H[2PhPyNO][Cl<sub>3</sub>]**: CCDC-2383803. C<sub>22</sub>H<sub>19</sub>Cl<sub>3</sub>N<sub>2</sub>O<sub>2</sub>, M = 449.74 g/mol, colorless needle, 0.387 × 0.045 × 0.025 mm<sup>3</sup>, triclinic, space group P $\bar{1}$ , a = 6.027(3) Å, b = 11.706(6) Å, c = 15.295(9) Å, α = 71.538(19)°, β = 81.375(19)°, γ = 89.527(14)°, V = 1011.1(10) Å<sup>3</sup>, Z = 2, D<sub>calc</sub> = 1.477 gcm<sup>-3</sup>, F000 = 464.0, μ = 0.475 mm<sup>-1</sup>, T = 100 K, θ<sub>max</sub> = 50.786°, 3636 total reflections, 1278 with I<sub>o</sub> > 2σ(I<sub>o</sub>), R<sub>int</sub> = 0.2284, 3636 data, 264 parameters, 156 restraints, GooF = 1.086, R<sub>1</sub> = 0.1321 and wR<sub>2</sub> = 0.2983 [I<sub>o</sub> > 2σ(I<sub>o</sub>)], R<sub>1</sub> = 0.3614 and wR<sub>2</sub> = 0.4380 (all reflections), 0.76 < dΔρ < -0.79 eÅ<sup>-3</sup>, non-merohedric twin.

#### 1.2.5 Complex [PyNOH][Cl]

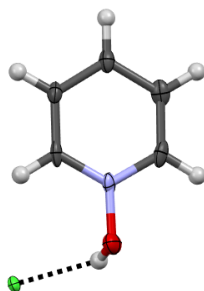

**Figure S5.** The X-ray crystal structure of **[PyNOH][Cl]** with the thermal displacement parameter at 50% probability level. Color Key: green = chlorine, blue = nitrogen, dark grey = carbon, white = hydrogen. Minor disordered fractions of chloride anions are omitted for viewing clarity. The black broken line represents the hydrogen bond.

Crystal data for **[PyNOH][Cl]**: CCDC-2383800. C<sub>5</sub>H<sub>6</sub>ClNO, M = 131.56 g/mol, colorless block, 0.128 × 0.12 × 0.08 mm<sup>3</sup>, orthorhombic, space group P2<sub>1</sub>2<sub>1</sub>2<sub>1</sub>, a = 7.2301(13) Å, b = 7.416(2) Å, c = 11.002(3)

$\text{\AA}$ ,  $\alpha = 90^\circ$ ,  $\beta = 90^\circ$ ,  $\gamma = 90^\circ$ ,  $V = 589.9(2) \text{\AA}^3$ ,  $Z = 4$ ,  $D_{\text{calc}} = 1.481 \text{ gcm}^{-3}$ ,  $F000 = 272.0$ ,  $\mu = 0.537 \text{ mm}^{-1}$ ,  $T = 100 \text{ K}$ ,  $\theta_{\text{max}} = 50.652^\circ$ , 674 total reflections, 621 with  $I_o > 2\sigma(I_o)$ ,  $R_{\text{int}} = 0.1953$ , 674 data, 81 parameters, 18 restraints,  $\text{GooF} = 1.095$ ,  $R_1 = 0.0931$  and  $wR_2 = 0.2235 [I_o > 2\sigma(I_o)]$ ,  $R_1 = 0.1019$  and  $wR_2 = 0.2327$  (all reflections),  $1.14 < d\Delta\rho < -1.03 \text{ e\AA}^{-3}$ , non-merohedric twin.

### 1.2.6. Complex [26DiMePyNOH][Cl]

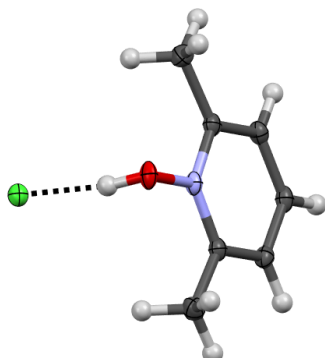

**Figure S6.** The X-ray crystal structure of [26DiMePyNOH][Cl] with the thermal displacement parameter at 50% probability level. Color Key: green = chlorine, blue = nitrogen, dark grey = carbon, white = hydrogen. The black broken line represents the hydrogen bond.

Crystal data for [26DiMePyNOH][Cl]: CCDC-2383798.  $\text{C}_7\text{H}_{10}\text{ClNO}$ ,  $M = 159.61 \text{ g/mol}$ , colorless plate,  $0.472 \times 0.142 \times 0.074 \text{ mm}^3$ , monoclinic, space group  $P2_1/m$ ,  $a = 6.2444(3) \text{\AA}$ ,  $b = 9.2125(4) \text{\AA}$ ,  $c = 6.7656(3) \text{\AA}$ ,  $\alpha = 90^\circ$ ,  $\beta = 94.855(2)^\circ$ ,  $\gamma = 90^\circ$ ,  $V = 387.81(3) \text{\AA}^3$ ,  $Z = 2$ ,  $D_{\text{calc}} = 1.367 \text{ gcm}^{-3}$ ,  $F000 = 168$ ,  $\mu = 0.421 \text{ mm}^{-1}$ ,  $T = 100 \text{ K}$ ,  $\theta_{\text{max}} = 52.704^\circ$ , 8522 total reflections, 769 with  $I_o > 2\sigma(I_o)$ ,  $R_{\text{int}} = 0.0434$ , 843 data, 54 parameters, 0 restraints,  $\text{GooF} = 1.116$ ,  $R_1 = 0.0253$  and  $wR_2 = 0.0621 [I_o > 2\sigma(I_o)]$ ,  $R_1 = 0.0312$  and  $wR_2 = 0.0682$  (all reflections),  $0.25 < d\Delta\rho < -0.30 \text{ e\AA}^{-3}$ .

### 1.2.7. Complex [2Me4OMePyNOH][Cl]

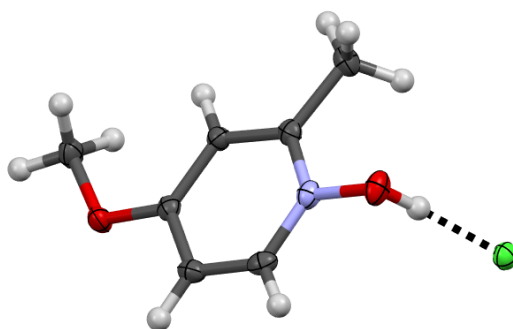

**Figure S7.** The X-ray crystal structure of [2Me4OMePyNOH][Cl] with the thermal displacement parameter at 50% probability level. Color Key: green = chlorine, blue = nitrogen, dark grey = carbon, white = hydrogen. The black broken line represents the hydrogen bond.

Crystal data for [2Me4OMePyNOH][Cl]: CCDC-2383806.  $\text{C}_7\text{H}_{10}\text{ClNO}_2$ ,  $M = 175.61 \text{ g/mol}$ , colorless block,  $0.554 \times 0.297 \times 0.192 \text{ mm}^3$ , triclinic, space group  $P\bar{1}$ ,  $a = 7.7469(4) \text{\AA}$ ,  $b = 9.1814(5) \text{\AA}$ ,  $c = 13.0548(7) \text{\AA}$ ,  $\alpha = 82.272(2)^\circ$ ,  $\beta = 80.701(2)^\circ$ ,  $\gamma = 66.100(2)^\circ$ ,  $V = 835.32(8) \text{\AA}^3$ ,  $Z = 4$ ,  $D_{\text{calc}} = 1.396 \text{ gcm}^{-3}$ ,  $F000 = 368$ ,  $\mu = 0.407 \text{ mm}^{-1}$ ,  $T = 100 \text{ K}$ ,  $\theta_{\text{max}} = 52.744^\circ$ , 34530 total reflections, 2926 with

$I_o > 2\sigma(I_o)$ ,  $R_{\text{int}} = 0.0507$ , 3416 data, 205 parameters, 0 restraints,  $\text{GooF} = 1.046$ ,  $R_1 = 0.0269$  and  $wR_2 = 0.0610$  [ $I_o > 2\sigma(I_o)$ ],  $R_1 = 0.0359$  and  $wR_2 = 0.0665$  (all reflections),  $0.26 < d\Delta\rho < -0.27 \text{ e}\text{\AA}^{-3}$ .

### 1.2.8. Complex [4tBuPyNOH][Cl]

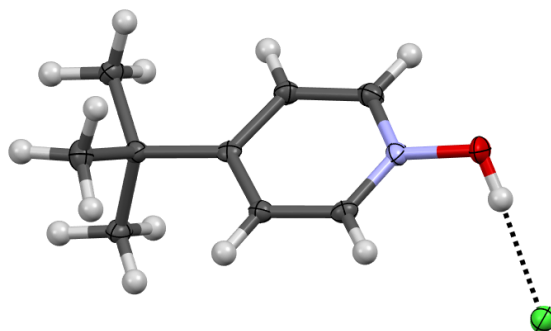

**Figure S8.** The X-ray crystal structure of [4tBuPyNOH][Cl] with the thermal displacement parameter at 50% probability level. Color Key: green = chlorine, blue = nitrogen, dark grey = carbon, white = hydrogen. The black broken line represents the hydrogen bond.

Crystal data for [4tBuPyNOH][Cl]: CCDC-2383805.  $\text{C}_9\text{H}_{14}\text{ClNO}$ ,  $M = 187.66 \text{ g/mol}$ , colorless block,  $0.543 \times 0.267 \times 0.253 \text{ mm}^3$ , orthorhombic, space group  $P2_12_12_1$ ,  $a = 8.8661(5) \text{ \AA}$ ,  $b = 10.3264(4) \text{ \AA}$ ,  $c = 10.6277(6) \text{ \AA}$ ,  $\alpha = 90^\circ$ ,  $\beta = 90^\circ$ ,  $\gamma = 90^\circ$ ,  $V = 973.02(9) \text{ \AA}^3$ ,  $Z = 4$ ,  $D_{\text{calc}} = 1.281 \text{ gcm}^{-3}$ ,  $F000 = 400$ ,  $\mu = 0.346 \text{ mm}^{-1}$ ,  $T = 100 \text{ K}$ ,  $\theta_{\text{max}} = 50.666^\circ$ , 12603 total reflections, 1740 with  $I_o > 2\sigma(I_o)$ ,  $R_{\text{int}} = 0.0328$ , 1776 data, 113 parameters, 0 restraints,  $\text{GooF} = 1.088$ ,  $R_1 = 0.0204$  and  $wR_2 = 0.0520$  [ $I_o > 2\sigma(I_o)$ ],  $R_1 = 0.0213$  and  $wR_2 = 0.0528$  (all reflections),  $0.21 < d\Delta\rho < -0.16 \text{ e}\text{\AA}^{-3}$ .

## 1.3. Halogen-bonded complexes

### 1.3.1. Complex Cl<sub>2</sub>-PyNO

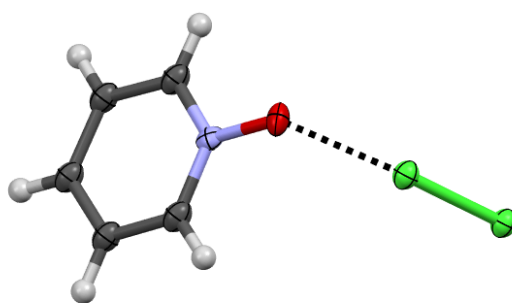

**Figure S9.** The X-ray crystal structure of Cl<sub>2</sub>-PyNO with the thermal displacement parameter at 50% probability level. Color Key: green = chlorine, blue = nitrogen, dark grey = carbon, white = hydrogen. The black broken line represents the halogen bond. Disordered parts were omitted for viewing clarity.

Crystal data for Cl<sub>2</sub>-PyNO: CCDC-2383807.  $\text{C}_5\text{H}_5\text{Cl}_2\text{NO}$ ,  $M = 166.00 \text{ g/mol}$ , colorless block,  $0.554 \times 0.231 \times 0.134 \text{ mm}^3$ , monoclinic, space group  $C2/c$ ,  $a = 13.8648(10) \text{ \AA}$ ,  $b = 13.7600(8) \text{ \AA}$ ,  $c = 16.1649(15) \text{ \AA}$ ,  $\alpha = 90^\circ$ ,  $\beta = 115.221(2)^\circ$ ,  $\gamma = 90^\circ$ ,  $V = 2789.9(4) \text{ \AA}^3$ ,  $Z = 16$ ,  $D_{\text{calc}} = 1.581 \text{ gcm}^{-3}$ ,  $F000 = 1344$ ,  $\mu = 0.842 \text{ mm}^{-1}$ ,  $T = 100 \text{ K}$ ,  $\theta_{\text{max}} = 50.69^\circ$ , 28774 total reflections, 2651 with  $I_o > 2\sigma(I_o)$ ,  $R_{\text{int}} = 0.0777$ , 2555 data, 140 parameters, 35 restraints,  $\text{GooF} = 1.282$ ,  $R_1 = 0.0757$  and  $wR_2 = 0.2459$  [ $I_o > 2\sigma(I_o)$ ],  $R_2 = 0.0874$  and  $wR_2 = 0.2591$  (all reflections),  $0.69 < d\Delta\rho < -0.80 \text{ e}\text{\AA}^{-3}$ .

### 1.3.2. Complex Cl<sub>2</sub>-26DiMePyNO

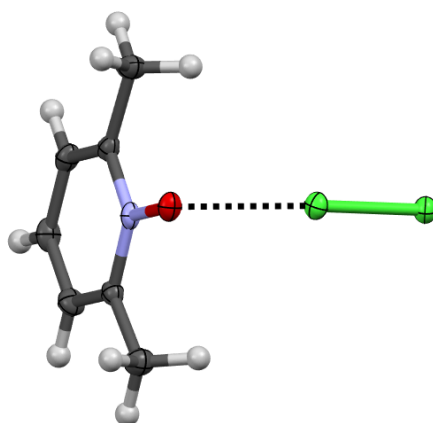

**Figure S10.** The X-ray crystal structure of **Cl<sub>2</sub>-26DiMePyNO** with the thermal displacement parameter at 50% probability level. Color Key: green = chlorine, blue = nitrogen, dark grey = carbon, white = hydrogen. The black broken line represents the halogen bond.

Crystal data for **Cl<sub>2</sub>-26DiMePyNO**: CCDC-2383799. C<sub>7</sub>H<sub>9</sub>Cl<sub>2</sub>NO, M = 194.05 g/mol, colorless plate, 0.378 × 0.102 × 0.074 mm<sup>3</sup>, monoclinic, space group *P2<sub>1</sub>/m*, a = 6.9789(7) Å, b = 7.1228(6) Å, c = 8.6438(9) Å, α = 90°, β = 92.072(4)°, γ = 90°, V = 429.40(7) Å<sup>3</sup>, Z = 2, D<sub>calc</sub> = 1.501 gcm<sup>-3</sup>, F000 = 200, μ = 0.696 mm<sup>-1</sup>, T = 100 K, θ<sub>max</sub> = 52.732°, 7419 total reflections, 795 with I<sub>o</sub> > 2σ(I<sub>o</sub>), R<sub>int</sub> = 0.0431, 950 data, 64 parameters, 0 restraints, GooF = 1.261, R<sub>1</sub> = 0.0373 and wR<sub>2</sub> = 0.0756 [I<sub>o</sub> > 2σ(I<sub>o</sub>)], R<sub>1</sub> = 0.0512 and wR<sub>2</sub> = 0.0887 (all reflections), 0.55 < dΔρ < -0.48 eÅ<sup>-3</sup>.

## 2. DFT studies

**Table S1:** Comparison of Cl<sub>2</sub>, I<sub>2</sub> XB interaction energies, ΔE<sub>int</sub> (kJ mol<sup>-1</sup>) and HB interaction energies.

| Complex                                     | ΔE <sub>int</sub> | XB/HB distance |
|---------------------------------------------|-------------------|----------------|
| PyNO...Cl <sub>2</sub>                      | -29               | 2.446          |
| 2,6-Me <sub>2</sub> -PyNO...Cl <sub>2</sub> | -36               | 2.410          |
| dioxane...Cl <sub>2</sub>                   | -20               | 2.575          |
| PyNO...I <sub>2</sub>                       | -47               | 2.576          |
| 2,6-Me <sub>2</sub> -PyNO...I <sub>2</sub>  | -55               | 2.555          |
| PyNO...HCl                                  | -59               | 1.493          |
| 2,6-Me <sub>2</sub> -PyNOH...HCl            | -71               | 1.426          |

**Table S2:** DFT computed  $^{15}\text{N}$  shielding constants and chemical shifts.

|                                  | <b>XB donor</b>                      |                                 | <b>XB acceptor</b>                   |                                 |
|----------------------------------|--------------------------------------|---------------------------------|--------------------------------------|---------------------------------|
|                                  | <b>Isotropic<br/>Shielding (ppm)</b> | <b>Chemical shift<br/>(ppm)</b> | <b>Isotropic<br/>Shielding (ppm)</b> | <b>Chemical shift<br/>(ppm)</b> |
| <b>NIS</b>                       | 133                                  | -283                            |                                      |                                 |
| <b>PyNO</b>                      |                                      |                                 | -60                                  | -90                             |
| <b>26DiMePyNO</b>                |                                      |                                 | -55                                  | -95                             |
| <b>Cl<sub>2</sub>-PyNO</b>       |                                      |                                 | -44                                  | -106                            |
| <b>Cl<sub>2</sub>-26DiMePyNO</b> |                                      |                                 | -39                                  | -111                            |
| <b>I<sub>2</sub>-PyNO</b>        |                                      |                                 | -39                                  | -111                            |
| <b>I<sub>2</sub>-26DiMePyNO</b>  |                                      |                                 | -34                                  | -116                            |
| <b>NIS-PyNO</b>                  | 97                                   | -247                            | -40                                  | -110                            |
| <b>NIS-26DiMePyNO</b>            | 90                                   | -240                            | -34                                  | -116                            |



Optimized structures.xyz

This file cannot be rendered in this PDF. Please download the source file.
